# Supplementary material for: A “turn-on” fluorescent probe for highly selective discrimination of hypochlorite (ClO−) from oxidants including dichromates (Cr2O72−) in aqueous media
Source: Royal Society of Chemistry journal article supplement (doi:10.1039/c9nj00610a), 2019-01-01
Supplement: c9nj00610a1.pdf [file c9nj00610a1.pdf]

## Supplementary Information

### **“Turn-on” Fluorescent Probe for Highly Selective Discrimination of Hypochlorite (ClO<sup>-</sup>) from Oxidants including Dichromate (Cr<sub>2</sub>O<sub>7</sub><sup>2-</sup>) in Aqueous Media**

Mushtaq Ahmed Shahid,<sup>[a],†</sup> Genggongwo Shi,<sup>[b],[c],†</sup> Muhammad Yousuf,<sup>[b]</sup> Jenica Marie L. Madridejos,<sup>[b]</sup> Farzana Mahmood,<sup>[a]</sup> Lubna Rasheed\*,<sup>[b],[d]</sup>

<sup>a</sup>Institute of Chemical Sciences, Baha-ud-Din Zakaria University, Multan 60800, Pakistan

<sup>b</sup>Department of Chemistry, Ulsan National Institute of Science and Technology (UNIST) Ulsan 44919, Republic of Korea

<sup>c</sup>School of Materials Science and Engineering, Ulsan National Institute of Science and Technology (UNIST), Ulsan 44919, Republic of Korea

<sup>d</sup>Division of Science and Technology, University of Education, Township, Lahore, Pakistan

†Authors contributed equally to this work.

Corresponding Author E-mail: [lubnarasheed@ue.edu.pk](mailto:lubnarasheed@ue.edu.pk) (L.R.)

## CONTENTS

1. NMR Spectra
2. Fluorescent Quantum Yield Determination
3. NMR Studies
4. Absorption Studies
5. Electrochemical Studies
6. Mass Spectrometry
7. Calculations

# 1. NMR Spectra

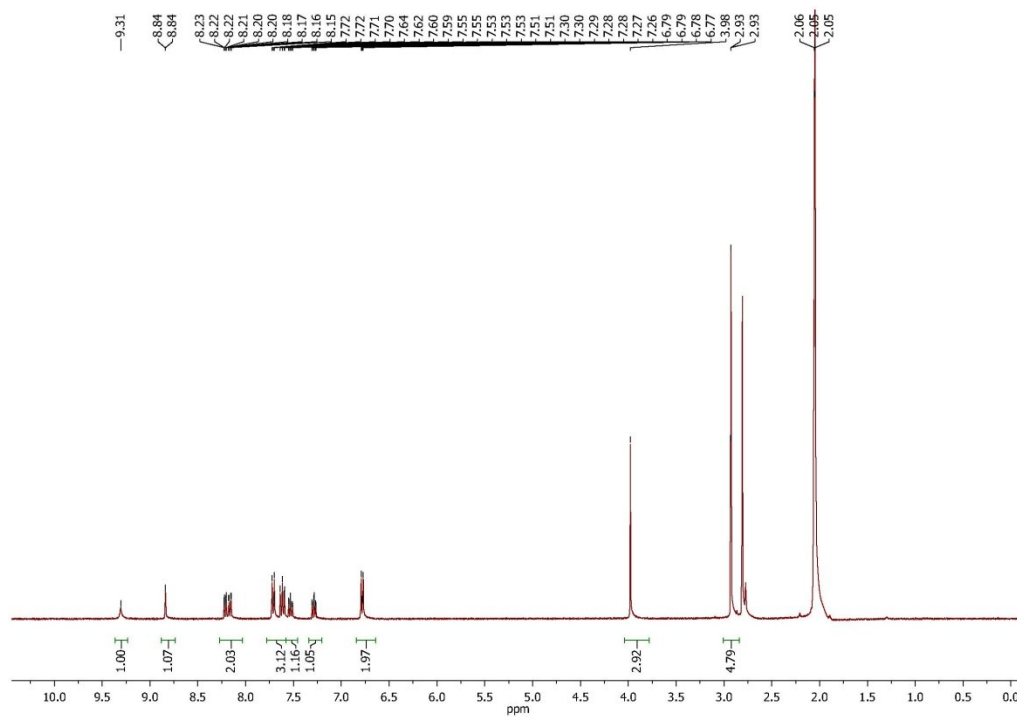

Figure S1-1.  $^1\text{H}$  NMR spectrum of **P1** in  $d_6$ -acetone.

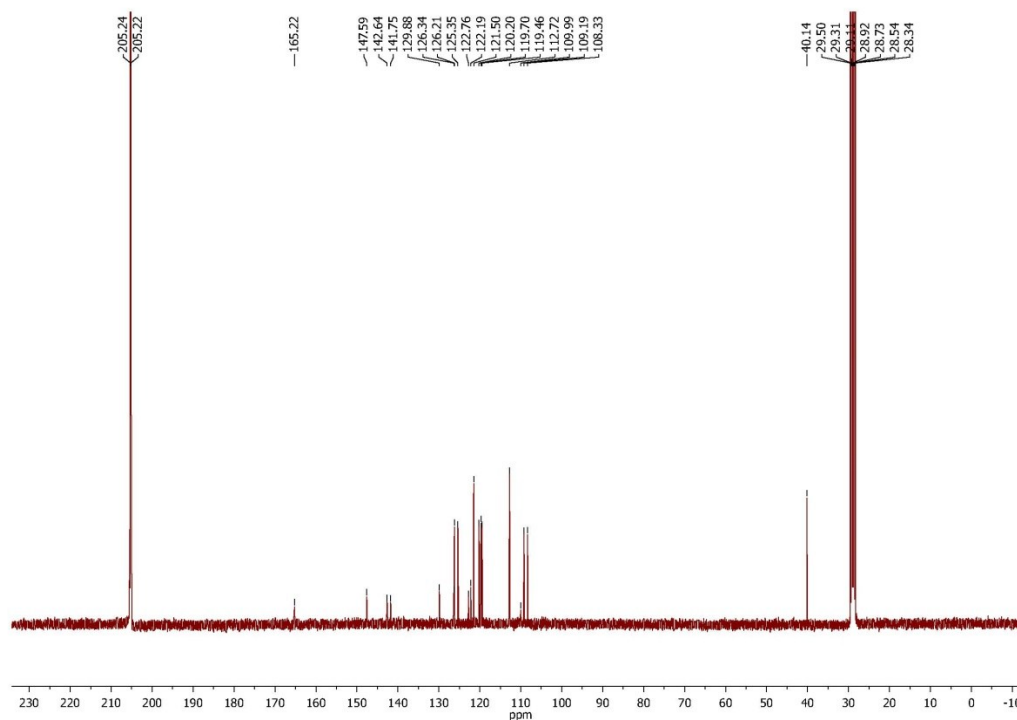

Figure S1-2.  $^{13}\text{C}$  NMR spectrum of **P1** in  $d_6$ -acetone.

## 2. Fluorescent Quantum Yield Determination

Anthracene was used as a standard for the quantum yield measurement of **P1**. Typically, the quantum yield was obtained by integrating the photons emitted by **P1** up to 600 nm and calculated using the following formula:<sup>1</sup>

$$\Phi_u = \Phi_s \frac{A_s F_u n^2}{A_u F_s n_0^2}$$

where  $A$  refers to absorbance at the excitation wavelength,  $F$  refers to integrated emission area across the band,  $\Phi$  refers to quantum yield,  $n$  is refraction index of the solvent containing the unknown ( $n_0$ , standard), subscript  $u$  refers to “unknown”, and subscript  $s$  refers to “standard”.

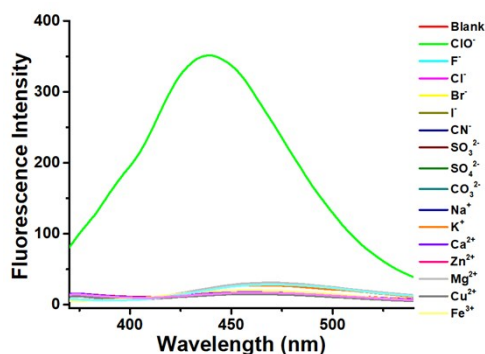

**Figure S2-1.** Emission spectra recorded for **P1** (2  $\mu$ M) (slit width = 5 nm;  $\lambda_{\text{ex}}$  = 280 nm) after the addition of an anions and cations (indicated) at pH 7.4 (10 mM aqueous phosphate buffer).

## 3. NMR Studies

10 mM solutions of **P1** were independently prepared in  $d_6$ -acetone with 10%  $\text{D}_2\text{O}$  and  $d_6$ -acetone, respectively. Afterward, known quantities of  $\text{KMnO}_4$  or  $\text{NaClO}$  were added and kept for a specified length of time after vigorous shaking. The resulting  $\text{NaClO}$  solutions were directly scanned at 298 K while the  $\text{KMnO}_4$  resultants were filtered to remove precipitated manganese species before data acquisition.

## 4. Absorption Studies

UV-Vis spectroscopy samples were prepared in a similar manner as those described in the fluorescence titration section using an optical path length of 10 mm.

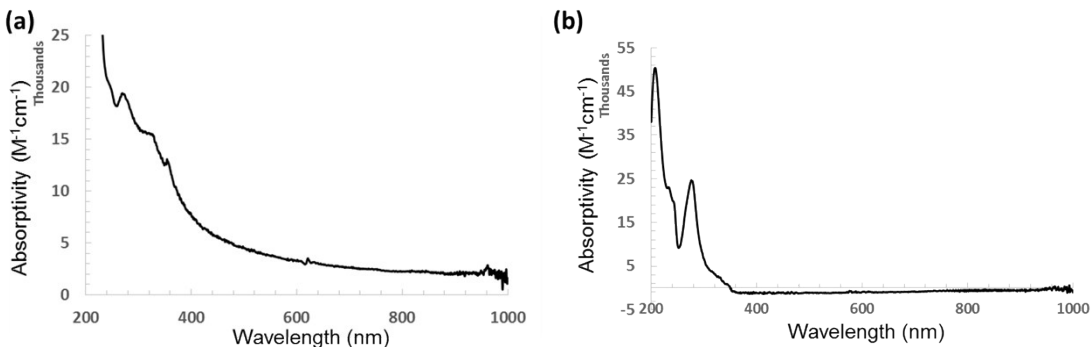

**Figure S2-2.** Absorption spectra of **P1** in 10 mM phosphate buffer (pH 7.4) (**a**), and after oxidation by  $\text{ClO}^-$  (**b**).

## 5. Electrochemical Studies

Cyclic voltammetry (CV) of 0.5 mM of **P1** in 75% acetone with 25% water were performed using 5 mM of tetrabutylammonium dihydrogen phosphate ( $\text{TBAH}_2\text{PO}_4$ ) as the supporting electrolyte. Various scan rates were applied. Platinum wire was used as working electrode,  $\text{Ag}/\text{AgCl}$  in 3 M  $\text{NaCl}$  (aq) was used as reference electrode, and carbon was used as the counter electrode.

## 6. Mass Spectrometry

Data were recorded for a solution of 2  $\mu\text{M}$  of **P1** in THF before and after the addition of 20 equiv. of  $\sim 5\%$   $\text{NaClO}_{(\text{aq})}$ .

## 7. Calculations

The electronic structure calculations for **P1**, and its respective oxidation products were performed with the Gaussian09 program package.<sup>2</sup> The ground state geometries and electronic structures of the complexes were optimized at the CAM-B3LYP/6-311++G(d,p) level. Time-dependent density functional theory (TD-DFT) calculations were used to determine the optical properties of the complexes based on the  $S_0$  ground-state geometry. All Gaussian calculations were performed with polarizable continuum model (solvent = water) to account for solvent effects. Gas-phase calculation of absorbance and fluorescence spectra for immediate comparison with experimental values were performed by Orca<sup>3</sup> program package.

**Table S3-1.** Calculated singlet excitation energies, oscillator strengths, and molecular orbitals (MOs) involved in the excitation for **P1**.

| Energy/eV <sup>a</sup> | Wavelength/nm | Oscillator strength | MOs       | Coefficient <sup>b</sup> |
|------------------------|---------------|---------------------|-----------|--------------------------|
| 4.21                   | 294.7         | 0.0343              | H-1 → L+2 | 0.19406                  |
|                        |               |                     | H → L+1   | 0.60349                  |
|                        |               |                     | L → L+1   | 0.23983                  |
| 4.35                   | 285.0         | 1.1052              | H-3 → L+2 | 0.10556                  |
|                        |               |                     | H → L+2   | 0.22327                  |
|                        |               |                     | L → L+2   | 0.59308                  |
|                        |               |                     | L → L+9   | 0.10823                  |
|                        |               |                     | L → L+15  | 0.10032                  |
| 4.41                   | 281.3         | 0.0554              | L → L+6   | 0.61007                  |
|                        |               |                     | L → L+8   | 0.26354                  |
| 4.80                   | 269.6         | 0.1979              | H-1 → L+1 | 0.49426                  |
|                        |               |                     | H → L+2   | 0.35220                  |

<sup>a</sup>Only selected excited states were considered. <sup>b</sup>Configuration interaction (CI) coefficients are in absolute value.

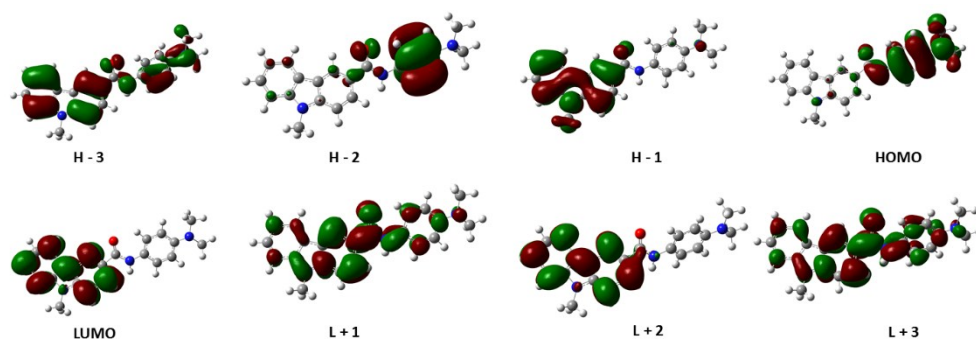

**Figure S3-1.** Calculated molecular orbitals of **P1** based on the ground state geometries.

**Table S3-2.** Calculated singlet excitation energies, oscillator strengths, and molecular orbitals (MOs) involved in the excitation for [P1-p-2e]<sup>+</sup>.

| Energy/eV <sup>a</sup> | Wavelength/nm | Oscillator strength | MOs       | Coefficient <sup>b</sup> |
|------------------------|---------------|---------------------|-----------|--------------------------|
| 2.69                   | 460.4         | 0.0116              | H → L     | 0.64667                  |
|                        |               |                     | H-1 → L   | 0.16686                  |
|                        |               |                     | H-2 → L   | 0.15240                  |
|                        |               |                     | H-3 → L   | 0.10435                  |
| 3.94                   | 314.4         | 0.0623              | H-4 → L   | 0.14934                  |
|                        |               |                     | H-6 → L   | 0.67502                  |
| 4.05                   | 306.0         | 1.3218              | H-7 → L   | 0.10108                  |
|                        |               |                     | H-6 → L   | 0.17891                  |
|                        |               |                     | H-4 → L   | 0.40320                  |
|                        |               |                     | H-3 → L   | 0.26558                  |
|                        |               |                     | H-1 → L+1 | 0.12404                  |
|                        |               |                     | H → L+2   | 0.40459                  |
| 4.34                   | 285.4         | 0.0676              | H-7 → L   | 0.10544                  |
|                        |               |                     | H-4 → L   | 0.21232                  |
|                        |               |                     | H-3 → L   | 0.15508                  |
|                        |               |                     | H-1 → L+1 | 0.27453                  |
|                        |               |                     | H-1 → L+2 | 0.22382                  |
|                        |               |                     | H → L+1   | 0.44309                  |
| 4.52                   | 274.5         | 0.2379              | H → L+2   | 0.21254                  |
|                        |               |                     | H-8 → L   | 0.12101                  |
|                        |               |                     | H-7 → L   | 0.52160                  |
|                        |               |                     | H-4 → L   | 0.16763                  |
|                        |               |                     | H-4 → L+1 | 0.10863                  |
|                        |               |                     | H-3 → L+1 | 0.29928                  |

<sup>a</sup>Only selected excited states were considered. <sup>b</sup>The CI coefficients are represented as their absolute values.

<sup>1</sup> D. F. Eaton, *Pure Appl. Chem.*, 1988, **60**, 1107.

<sup>2</sup> Gaussian 09, Revision **E.01**, Frisch, M. J.; Trucks, G. W.; Schlegel, H. B.; Scuseria, G. E.; Robb, M. A.; Cheeseman, J. R.; Scalmani, G.; Barone, V.; Mennucci, B.; Petersson, G. A.; Nakatsuji, H.; Caricato, M.; Li, X.; Hratchian, H. P.; Izmaylov, A. F.; Bloino, J.; Zheng, G.; Sonnenberg, J. L.; Hada, M.; Ehara, M.; Toyota, K.; Fukuda, R.; Hasegawa, J.; Ishida, M.; Nakajima, T.; Honda, Y.; Kitao, O.; Nakai, H.; Vreven, T.; Montgomery, J. A., Jr.; Peralta, J. E.; Ogliaro, F.; Bearpark, M.; Heyd, J. J.; Brothers, E.; Kudin, K. N.; Staroverov, V. N.; Kobayashi, R.; Normand, J.; Raghavachari, K.; Rendell, A.; Burant, J. C.; Iyengar, S. S.; Tomasi, J.; Cossi, M.; Rega, N.; Millam, J. M.; Klene, M.; Knox, J. E.; Cross, J. B.; Bakken, V.; Adamo, C.; Jaramillo, J.; Gomperts, R.; Stratmann, R. E.; Yazyev, O.; Austin, A. J.; Cammi, R.; Pomelli, C.; Ochterski, J. W.; Martin, R. L.; Morokuma, K.; Zakrzewski, V. G.; Voth, G. A.; Salvador, P.; Dannenberg, J. J.; Dapprich, S.; Daniels, A. D.; Farkas, Ö.; Foresman, J. B.; Ortiz, J. V.; Cioslowski, J.; Fox, D. J. Gaussian, Inc., Wallingford CT, 2009.

<sup>3</sup> F. Neese, *Wires Comput. Mol. Sci.*, 2012, **2**, 73.
